# Supplementary material for: Anti-counterfeiting applications by photochromism induced modulation of reversible upconversion luminescence in TiO2:Yb3+,Er3+ ceramic
Source: Royal Society of Chemistry journal article supplement (doi:10.1039/d2tc00859a), 2022-01-01
Supplement: d2tc00859a1.pdf [file d2tc00859a1.pdf]

## Supporting Information

### Anti-Counterfeiting Applications by Photochromism induced Modulation of Reversible upconversion Luminescence in $\text{TiO}_2$ : $\text{Yb}^{3+}$ , $\text{Er}^{3+}$ ceramic

Asif Ali Haider<sup>a</sup>, Yangke Cun<sup>a</sup>, Xue Bai<sup>a</sup>, Zan Xu<sup>a</sup>, Yingzhu Zi<sup>a</sup>, Jianbei Qiu<sup>a</sup>, Zhiguo Song<sup>a</sup>,

Anjun Huang<sup>b,\*</sup>, Zhengwen Yang<sup>a,\*</sup>

<sup>a</sup>College of Materials Science and Engineering, Kunming University of Science and Technology, Kunming, 650093, China. Corresponding Author E-mails: yangzw@kust.edu.cn

<sup>b</sup>Department of Chemistry, Hong Kong Baptist University, Kowloon Tong, Hong Kong S.A.R., P. R. China. E-mail: aj.huang@outlook.com

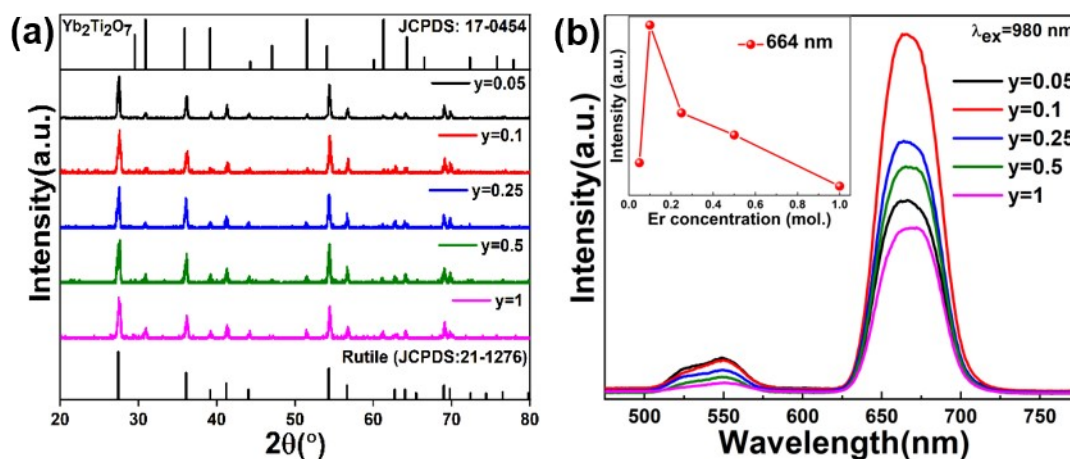

**Figure S1.** (a) The XRD patterns of  $\text{TiO}_2$ :1 mol %  $\text{Yb}^{3+}$ , y mol %  $\text{Er}^{3+}$  (y=0.05, 0.1, 0.25, 0.5, and 1) ceramics. (b) Under 980 nm excitation, the UCL spectra of  $\text{TiO}_2$ :1 mol %  $\text{Yb}^{3+}$ , y mol %  $\text{Er}^{3+}$  (y=0.05, 0.1, 0.25, 0.5, and 1) ceramics.

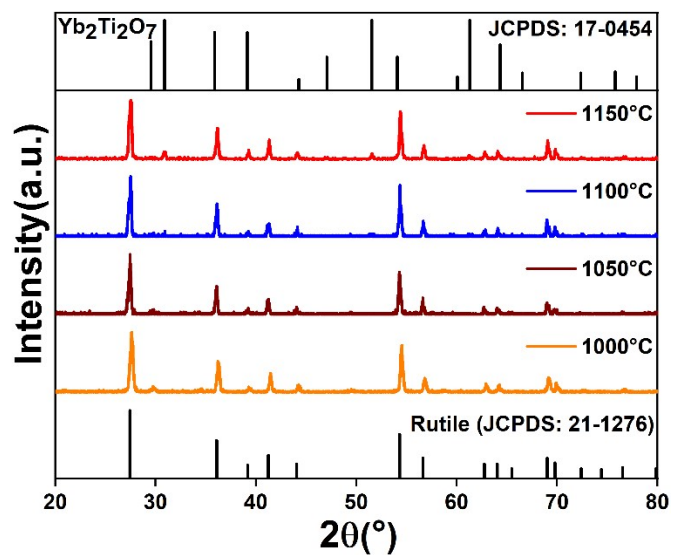

**Figure S2.** XRD patterns of TO-1000, TO-1050, TO-1100, and TO-1150.

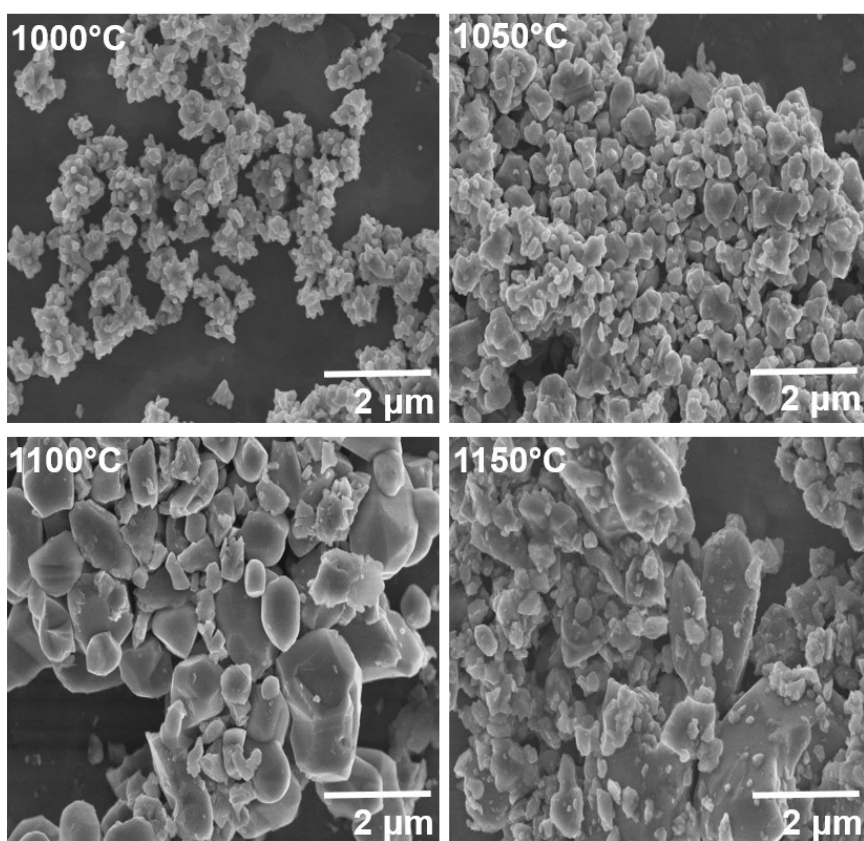

**Figure S3.** FESEM images of TO-1000, TO-1050, TO-1100, and TO-1150.

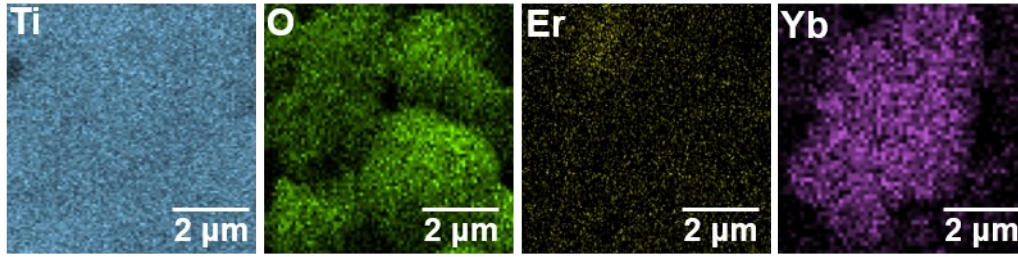

**Figure S4.** The SEM-EDS elemental mapping images of Ti, O, Yb, and Er in TO-1150 ceramic.

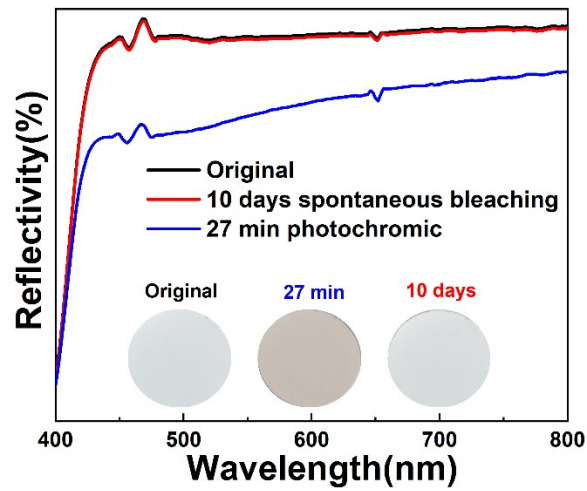

**Figure S5.** The diffuse reflection spectra and corresponding photos of original TO-1150, photochromic TO-1150, and spontaneous bleaching TO-1150.

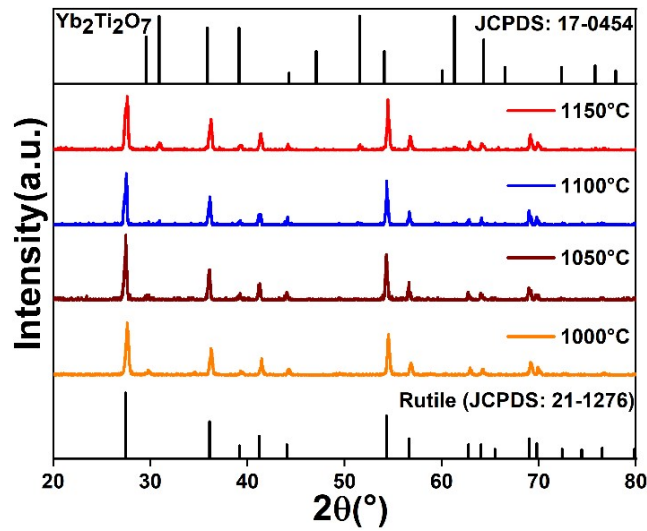

**Figure S6.** XRD patterns of photochromic TO-1000, TO-1050, TO-1100, and TO-1150.

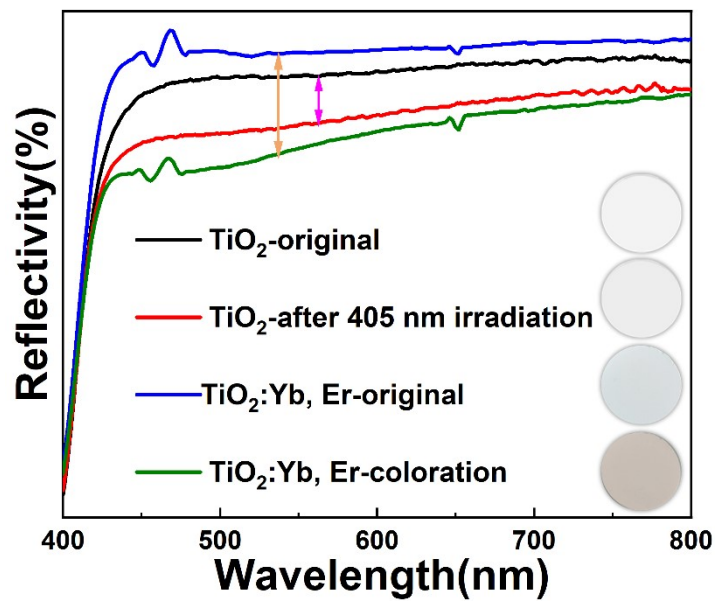

**Figure S7.** The diffuse reflection spectra and corresponding photos for undoped  $\text{TiO}_2$  and TO-1150 ceramics before and after 405 nm LED irradiation for 27 min.

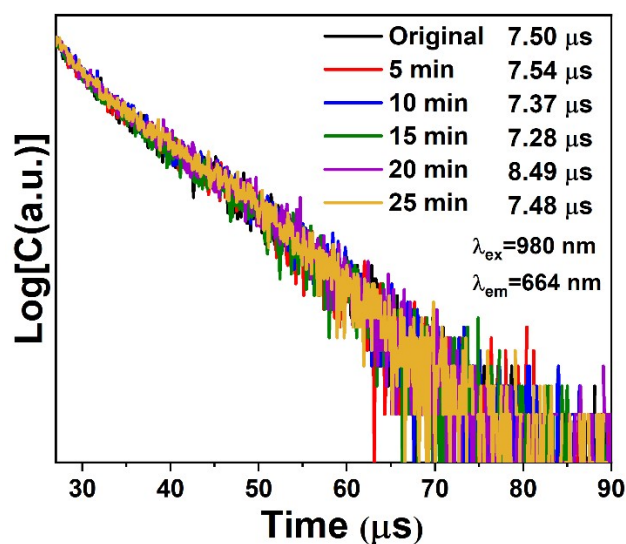

**Figure S8.** Under 980 nm laser excitation, the decay curves ( $\lambda_{\text{em}} = 664 \text{ nm}$ ) of TO-1150 after 405 nm LED irradiating from 0 to 25 min.

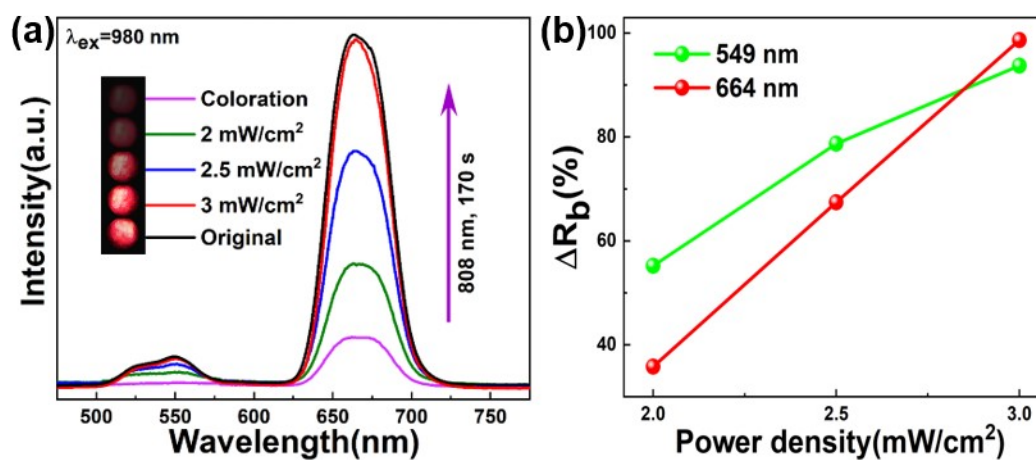

**Figure S9.** (a) Under 980 nm excitation, the UCL spectra of TO-1150-PC as a function of laser power density. (b) The plot of  $\Delta R_b$  with the 808 nm laser power density.
